# Supplementary material for: A portrait of obstructive sleep apnea risk factors in 27,210 middle-aged and older adults in the Canadian Longitudinal Study on Aging
Source: PubMed Central journal article supplement (PMC8948183; doi:10.1038/s41598-022-08164-6), 2022-03-24

Supplementary figure S1

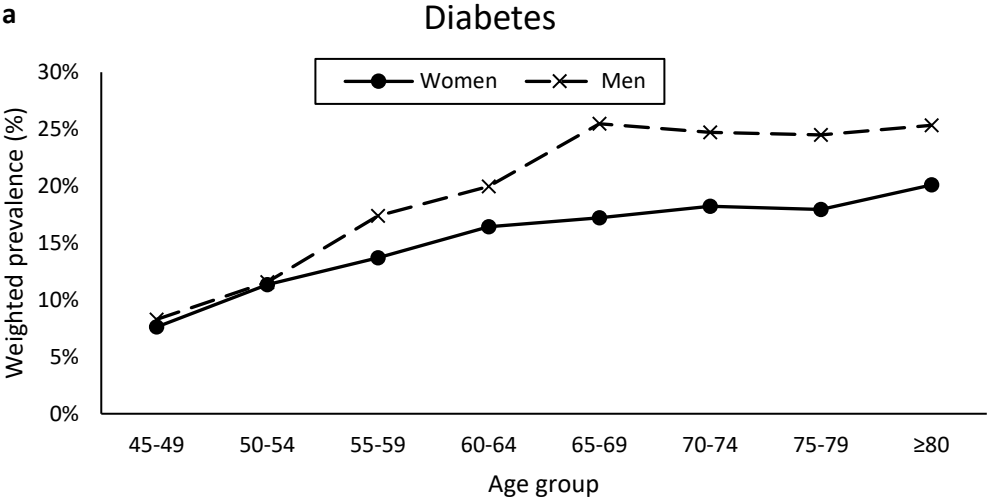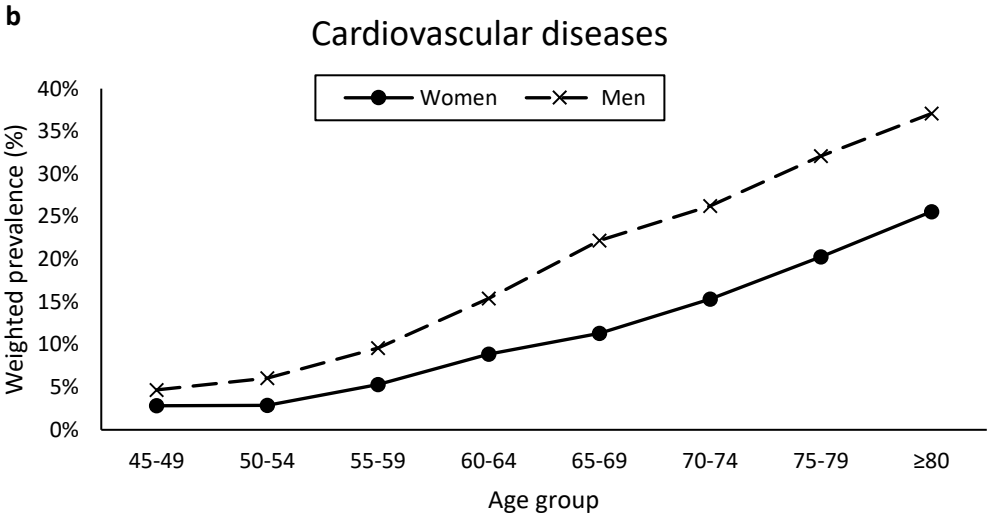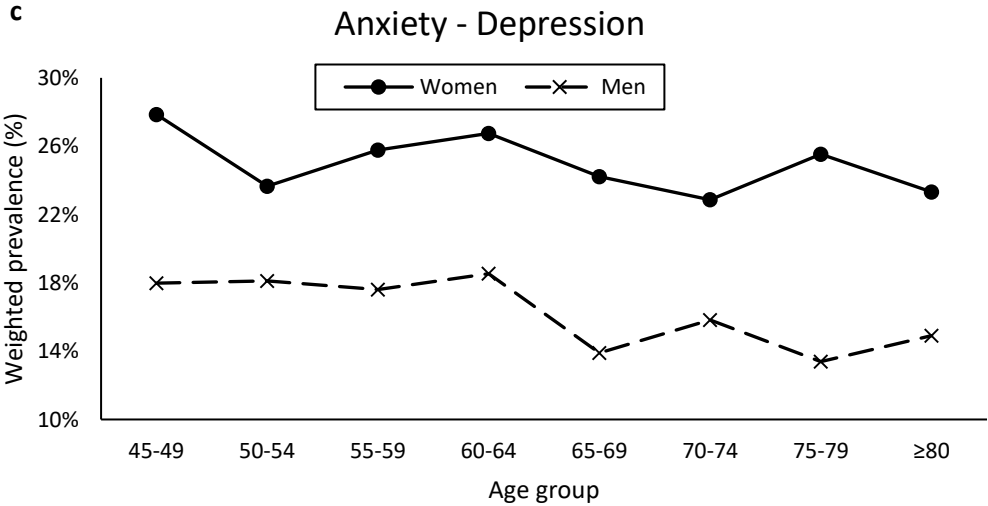

d

### Cerebrovascular diseases

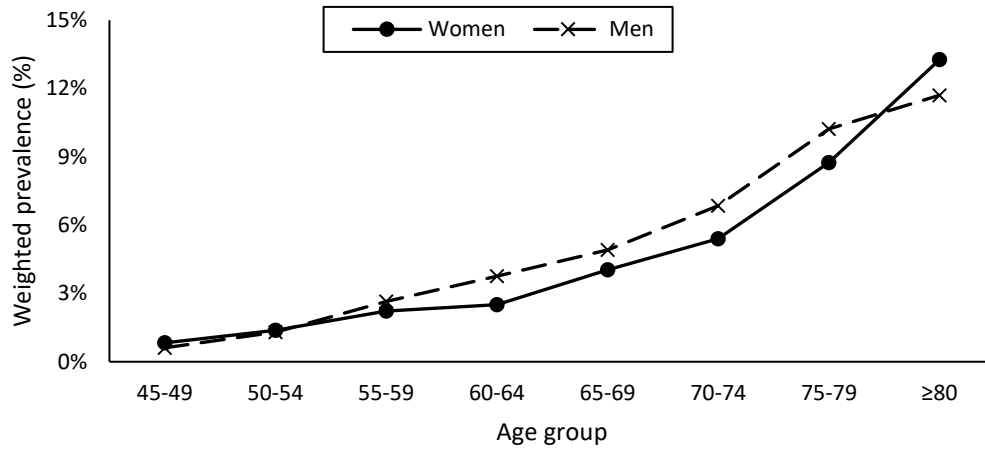

e

### Arthritis

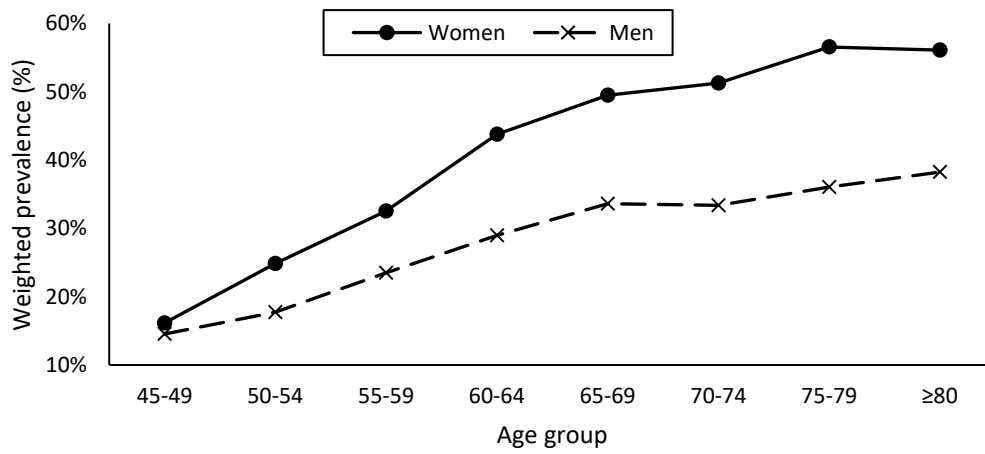

f

### Asthma

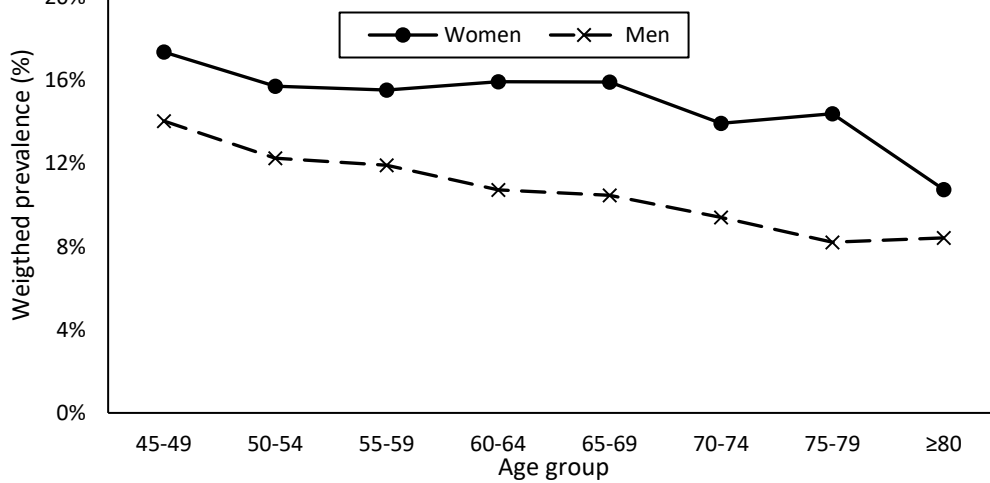

g

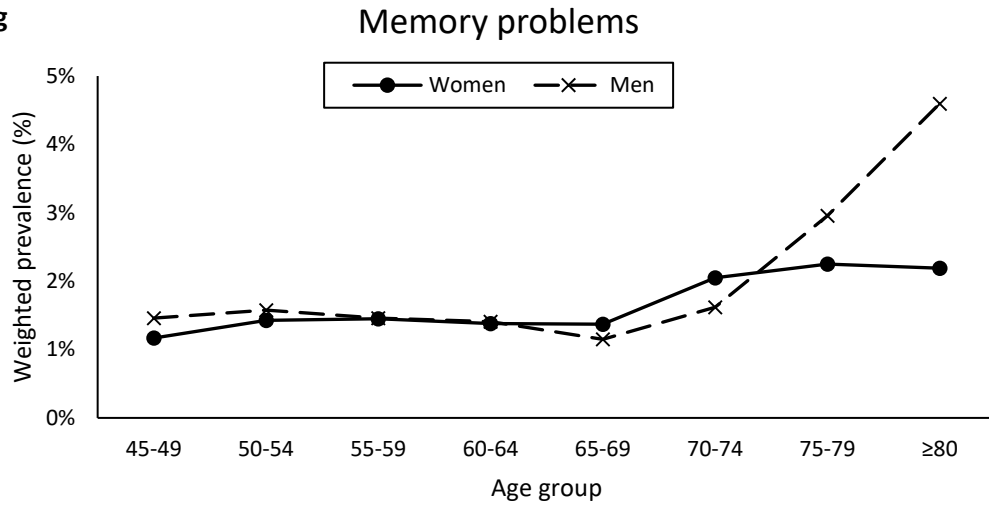

h

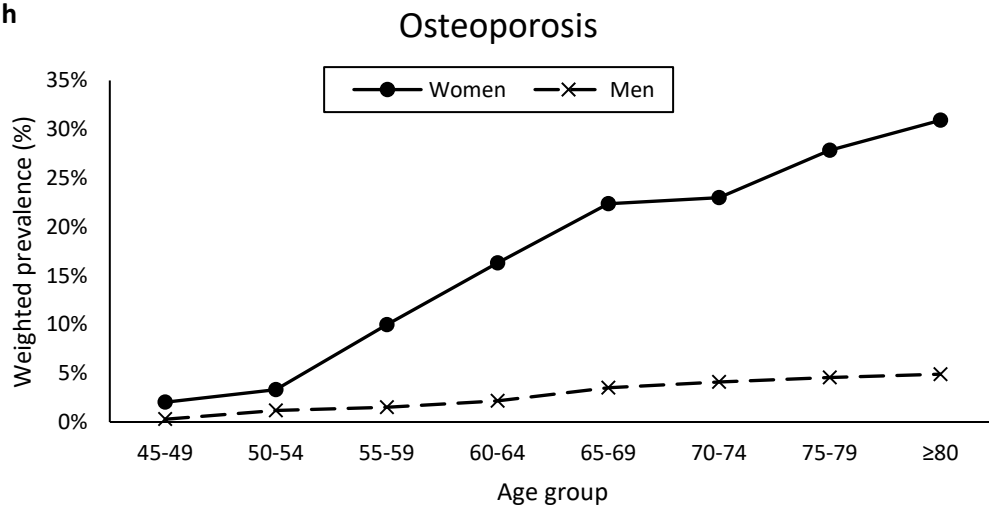

i

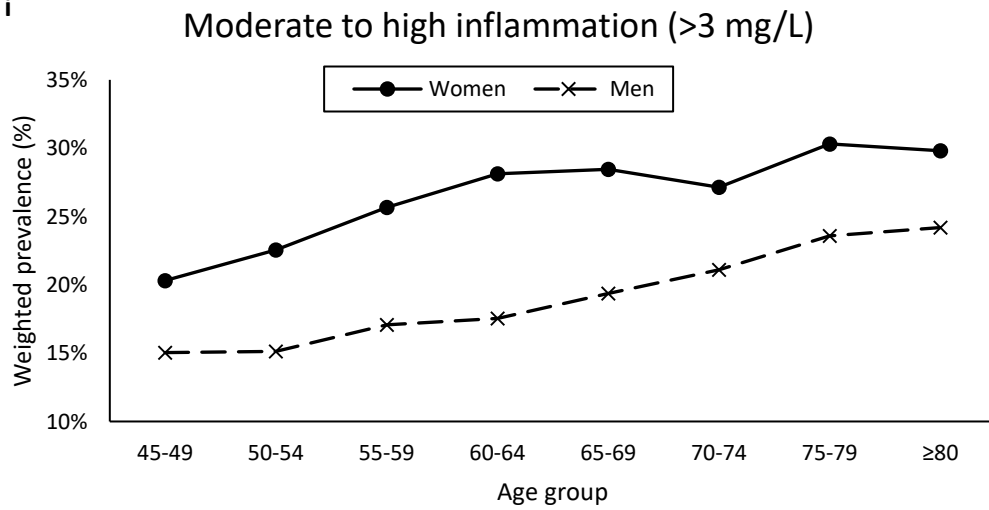

Supplement: 41598_2022_8164_MOESM1_ESM.pdf [file 41598_2022_8164_MOESM1_ESM.pdf]
