# Supplementary material for: A portrait of obstructive sleep apnea risk factors in 27,210 middle-aged and older adults in the Canadian Longitudinal Study on Aging
Source: PubMed Central journal article supplement (PMC8948183; doi:10.1038/s41598-022-08164-6), 2022-03-24
Supplement: 41598_2022_8164_MOESM2_ESM.pdf [file 41598_2022_8164_MOESM2_ESM.pdf]

# **A portrait of obstructive sleep apnea risk factors in 27,210 middle-aged and older adults in the Canadian Longitudinal Study on Aging**

Cynthia Thompson<sup>1</sup>, Julie Legault<sup>1,8</sup>, Gregory Moullec<sup>1,3</sup>, Marc Baltzan<sup>4,5</sup>, Nathan Cross<sup>6,7,8</sup>, Thien Thanh Dang-Vu<sup>6,7,8</sup>, Marie-Ève Martineau-Dussault<sup>1,2</sup>, Patrick Hanly<sup>9</sup>, Najib Ayas<sup>10,11</sup>, Dominique Lorrain<sup>12,13</sup>, Gillian Einstein<sup>14</sup>, Julie Carrier<sup>1,2</sup>, Nadia Gosselin<sup>1,2</sup>

<sup>1</sup>Center for Advanced Research in Sleep Medicine, CIUSSS Nord-de-l'Ile-de-Montreal, Montreal, Canada

<sup>2</sup>Department of psychology, Université de Montréal, Montreal, Canada

<sup>3</sup>École de santé publique, Département de Médecine Sociale et Préventive, Université de Montréal, Montreal, Canada

<sup>4</sup>Mount Sinai Hospital Center, Montreal, Canada

<sup>5</sup>Department of Epidemiology and Biostatistics, Faculty of Medicine, McGill University, Montreal, Canada

<sup>6</sup>Institut Universitaire de Geriatrie de Montreal and CRIUGM, CIUSSS du Centre-Sud-de-l'Ile-de-Montreal, Montreal, Canada

<sup>7</sup>PERFORM Centre, Concordia University, Montreal, Canada

<sup>8</sup>Center for Studies in Behavioral Neurobiology, Department of Health, Kinesiology and Applied Physiology, Concordia University, Montreal, Canada

<sup>9</sup>Sleep Centre, Foothills Medical Centre, Cumming School of Medicine, University of Calgary, Calgary, Alberta, Canada

<sup>10</sup>Department of Medicine, University of British Columbia, Vancouver, British Columbia, Canada

<sup>11</sup>Blackmore Sleep Disorders Program, University of British Columbia Hospital, Vancouver, British Columbia, Canada

<sup>12</sup>Research centre on aging, University institute of geriatrics of Sherbrooke, CIUSSS de l'Estrie – CHUS, Sherbrooke, Canada

<sup>13</sup>University of Sherbrooke, Sherbrooke, Canada

<sup>14</sup>Department of Psychology, University of Toronto, Toronto, Canada

**Corresponding Author:**

Nadia Gosselin, Ph.D.

Center for Advanced Research in Sleep Medicine, Hôpital du Sacré-Cœur de Montréal

5400 Gouin Blvd. West, Office J-5135, Montreal, Quebec, H4J 1C5, Canada

Tel.: +1 514 338 2222, ext. 7717; Fax: +1 514 338 3893; Email: [nadia.gosselin@umontreal.ca](mailto:nadia.gosselin@umontreal.ca)

## SUPPLEMENTARY METHODS

Participants in the Canadian Longitudinal Study on Aging (CLSA) comprehensive cohort were sampled using provincial healthcare registration databases (N = 4,129; 14%) or telephone random digit dialing (N = 25,968; 86%), and divided among seven participating provinces to ensure more precise estimates of various parameters within each national region. The response rate (contact rate \* cooperation rate) was 9% for the healthcare registries sampling and 10% for the telephone random digit dialing sampling. Sampling was stratified by sex, age (45-54; 55-64; 65-74 and 75-85) and distance from the data collection sites. The CLSA cohort is representative of the eligible Canadian population and generalizable on many key variables, although the cohort was more educated, had a higher household income, a greater proportion of Canadian-born participants and a better self-reported appreciation of general health<sup>1</sup>. Also, the CLSA comprehensive cohort was recruited from urban regions located 25-50 km from the data collection sites, which limits the generalizability of our findings to populations living in more rural areas.

Sociodemographic and lifestyle-related control variables included age, sex, marital status, ethnicity, income, level of education, working status, smoking, alcohol consumption and level of physical activity, and are detailed in the supplementary material. Marital status was dichotomized as either “living with a spouse” or not, the latter including single, divorced and widowed participants. Ethnicity was dichotomized as “Caucasian” and “Non-Caucasian” based on the self-reported racial / cultural background. Income was stratified as <\$20K, \$20K-49,9K, \$50K-99,9K, \$100K-149,9K, >\$150K CAD. Four categories were used for education level: less than secondary graduation; secondary graduation without post-secondary education; some post-secondary education; post-secondary education degree / diploma. Information related to working status was stratified as active worker, partly retired, or not working (completely retired / unemployed / housewives).

Lifestyle-related variables pertained to modifiable behaviors and included self-reported smoking, alcohol consumption, level of physical activity, hours of sleep per night and general sleep quality. Three categories were used for smoking status: current smoker, past smoker or never smoker. Alcohol use was stratified based on the long-term health risk determined by the Canadian Guidelines for Low-Risk Drinking<sup>2</sup>: high-

risk, >10 drinks for women and >15 drinks for men weekly; low-risk, 1-10 drinks for women and 1-15 drinks for men weekly; and no drinking. Physical activity was quantified using the Physical Activity Scale for the Elderly (PASE) questionnaire<sup>3</sup> which gives a global score in METS (metabolic equivalent of task) representing the individuals' daily energy expenditure, and quintile cut-off values specific for women and men were used. Self-reported sleep duration and quality duration were also considered. Participants who reported sleeping between 6 and 8 hours per night were considered “normal” sleepers, while those sleeping less than 6 hours or more than 8 hours per night were considered “short” and “long” sleepers, respectively. General sleep quality was assessed by the interviewer asking the multiple-choice question “How satisfied or dissatisfied are you with your current sleep pattern?”, with suggested response categories being “Very satisfied”, “Satisfied”, “Neutral”, “Dissatisfied” and “Very dissatisfied”. Participants who answered being dissatisfied or very dissatisfied were considered having unsatisfactory sleep quality while the others were considered having satisfactory sleep.

## **SUPPLEMENTARY RESULTS**

Supplementary table S1 shows detailed socio-demographic, clinical and lifestyle characteristics of women and men at low- and high-risk of OSA.

Supplementary table S2 presents the weighted prevalence odds ratios with 95% confidence intervals for high-risk of having OSA in women and men participants for all clinical variables included in the regression models.

### **Sensitivity analyses of OSA-related medical comorbidities and level of inflammation with respect to age**

Because age was not independently associated with high-risk of OSA, we investigated how OSA-related medical comorbidities varied with age in women and men (Supplementary figure S1). Regardless of OSA risk, in both women and men, prevalence of cardiovascular and cerebrovascular comorbidities increased exponentially with age, while the increases in diabetes and arthritis followed a logarithmic trend. Memory problems were more prevalent with increasing age, with an abrupt increase in men aged 70 years old and

more. Osteoporosis was also more prevalent with age, especially in women as compared to men. The prevalence of depression-anxiety disorders decreased at ages 65 and over in both women and men, and the prevalence of asthma also decreased with age. The prevalence of moderate to high systemic inflammation ( $\geq 3$  mg/L) also increased with age in both women and men. All changes reported from the sensitivity analyses were significant ( $p < 0.001$ ).

**Sensitivity analyses to verify the association between systemic inflammation and OSA risk, independently of obesity**

We conducted sex-specific linear regressions to test the independent association of each STOP-Obesity item with blood hs-CRP level (Supplementary table S3). The results showed that in women, the presence of snoring, tiredness and/or fatigue, observed apneas, high blood pressure and obesity were all significantly associated with higher hs-CRP levels. In men, observed apneas, high blood pressure and obesity were associated with hs-CRP levels, but not snoring nor tiredness.

**Supplementary table S1:** Crude number and weighted proportion of women and men presenting each socio-demographic, clinical and lifestyle determinant, based to their risk of having OSA (low vs high)

|                                |                          | Women    |       |           |       | Men      |       |           |       |
|--------------------------------|--------------------------|----------|-------|-----------|-------|----------|-------|-----------|-------|
|                                |                          | Low-risk |       | High-risk |       | Low-risk |       | High-risk |       |
|                                |                          | N        | (%)   | N         | (%)   | N        | (%)   | N         | (%)   |
| Total N                        |                          | 11,790   | ----- | 2009      | ----- | 10,313   | ----- | 3098      | ----- |
| Marital status                 | Living with a spouse     | 7493     | 73.2  | 1093      | 62.6  | 8127     | 82.9  | 2512      | 84.4  |
| Ethnicity                      | Caucasian                | 10,843   | 91.7  | 1772      | 88.2  | 9376     | 90.4  | 2827      | 90.6  |
| Education                      | No secondary degree      | 576      | 4.5   | 180       | 9.0   | 425      | 3.5   | 192       | 5.3   |
|                                | Secondary degree         | 1155     | 9.5   | 251       | 12.7  | 192      | 7.4   | 274       | 8.4   |
|                                | No post-secondary degree | 832      | 6.5   | 202       | 9.3   | 698      | 6.1   | 250       | 6.7   |
|                                | Post-secondary degree    | 9216     | 79.5  | 1373      | 69.0  | 8340     | 83.0  | 2378      | 79.6  |
| Working status                 | Working                  | 5408     | 56.3  | 745       | 44.2  | 4841     | 62.7  | 1258      | 54.1  |
|                                | Partly retired           | 1091     | 8.6   | 169       | 8.8   | 1305     | 10.1  | 447       | 12.3  |
|                                | Retired/Unemployed       | 5232     | 35.2  | 1082      | 47.0  | 4153     | 27.2  | 1390      | 33.6  |
| Income                         | <\$20,000                | 614      | 5.4   | 122       | 6.3   | 512      | 5.0   | 168       | 6.6   |
|                                | \$20-50,000              | 2486     | 22.5  | 453       | 23.4  | 2175     | 22.3  | 620       | 21.7  |
|                                | \$50-100,000             | 3885     | 35.2  | 620       | 32.9  | 3429     | 35.7  | 1041      | 34.2  |
|                                | \$100-150,000            | 2136     | 19.1  | 358       | 19.2  | 1901     | 19.9  | 579       | 20.4  |
|                                | >\$150,000               | 358      | 17.7  | 341       | 18.2  | 1638     | 17.0  | 459       | 17.0  |
| Smoking status                 | No smoker                | 6176     | 53.0  | 905       | 44.7  | 4824     | 50.5  | 1128      | 39.5  |
|                                | Past smoker              | 4711     | 38.9  | 913       | 45.4  | 4533     | 39.7  | 1166      | 50.3  |
|                                | Current smoker           | 903      | 8.1   | 191       | 9.6   | 955      | 9.8   | 307       | 10.2  |
| Alcohol                        | No drinker               | 2475     | 21.5  | 578       | 31.9  | 1475     | 14.4  | 553       | 18.2  |
|                                | Low-risk drinker         | 6537     | 68.0  | 882       | 58.1  | 6474     | 72.8  | 1733      | 67.7  |
|                                | High-risk drinker        | 1089     | 10.6  | 154       | 10.0  | 1163     | 12.8  | 394       | 14.2  |
| Sleep duration                 | Short (<6h)              | 1503     | 12.1  | 441       | 21.6  | 1028     | 10.3  | 493       | 16.2  |
|                                | Normal (6-8h)            | 9586     | 81.9  | 1405      | 70.3  | 8812     | 67.7  | 2447      | 79.6  |
|                                | Long (>8h)               | 676      | 6.0   | 150       | 8.1   | 457      | 3.9   | 148       | 4.2   |
| Sleep quality                  | Satisfactory             | 8624     | 73.0  | 1217      | 59.5  | 8273     | 79.5  | 2187      | 69.8  |
| Level of inflammation (hs-CRP) | Normal (<1 mg/L)         | 4222     | 42.7  | 313       | 18.5  | 4492     | 50.3  | 879       | 33.4  |
|                                | Mild (1-3 mg/L)          | 3842     | 35.3  | 683       | 38.5  | 3446     | 35.8  | 1216      | 41.5  |
|                                | Moderate (3-10 mg/L)     | 2135     | 19.3  | 638       | 35.3  | 1279     | 11.7  | 632       | 22.1  |
|                                | High (>10 mg/L)          | 320      | 2.7   | 149       | 7.8   | 223      | 2.2   | 94        | 3.0   |
| Comorbidities                  | Diabetes                 | 1386     | 10.6  | 642       | 30.4  | 1580     | 12.9  | 969       | 27.2  |
|                                | Cardiovascular           | 908      | 6.4   | 346       | 15.6  | 1491     | 11.2  | 728       | 19.6  |
|                                | Cerebrovascular          | 365      | 2.4   | 141       | 6.4   | 400      | 2.7   | 214       | 5.2   |
|                                | Anxiety / Depression     | 2620     | 22.1  | 767       | 39.5  | 1442     | 14.4  | 692       | 23.1  |
|                                | Memory problems          | 152      | 1.2   | 49        | 2.9   | 136      | 1.2   | 81        | 2.9   |
|                                | COPD                     | 615      | 4.3   | 217       | 10.7  | 416      | 3.3   | 224       | 5.8   |
|                                | Asthma                   | 1670     | 14.2  | 456       | 23.0  | 1052     | 10.8  | 392       | 13.9  |
|                                | Arthritis                | 4474     | 32.8  | 1079      | 51.2  | 2668     | 21.9  | 1095      | 31.7  |
|                                | Hypothyroidism           | 2193     | 17.7  | 485       | 24.3  | 595      | 5.2   | 222       | 7.1   |
|                                | Dementia                 | 19       | 0.2   | 7         | 0.3   | 24       | 0.1   | 8         | 0.3   |
|                                | Osteoporosis             | 1764     | 12.2  | 297       | 13.9  | 241      | 1.8   | 77        | 2.2   |
|                                | Parkinson's disease      | 39       | 0.3   | 6         | 0.2   | 57       | 0.5   | 14        | 0.3   |
| PASE score                     | Quintile 1               | 2440     | 18.0  | 652       | 30.3  | 2319     | 17.8  | 904       | 25.1  |
|                                | Quintile 2               | 2542     | 19.6  | 476       | 22.6  | 2384     | 19.8  | 724       | 20.9  |
|                                | Quintile 3               | 2406     | 20.1  | 354       | 18.7  | 2143     | 20.3  | 630       | 20.8  |
|                                | Quintile 4               | 2197     | 21.0  | 271       | 14.3  | 1803     | 20.9  | 462       | 17.8  |
|                                | Quintile 5               | 2126     | 21.4  | 232       | 14.1  | 1570     | 21.3  | 353       | 15.4  |

**Notes:** Low-risk of OSA corresponds to a STOP-Obesity score <3; High-risk of OSA corresponds to a STOP-Obesity score  $\geq 3$ . Low-risk drinker: 1-10 drinks for women and 1-15 drinks for men, weekly. High-risk drinker: >10 drinks for women and >15 drinks for men, weekly. PASE quintiles use sex-specific cutoff values.

**Abbreviations:** OSA: Obstructive sleep apnea; COPD: Chronic obstructive pulmonary disease; PASE: Physical activity scale for the elderly; hs-CRP: high-sensitivity C-reactive protein.

**Supplementary table S2:** Sex-specific weighted prevalence odds ratios with 95% confidence intervals for high-risk of having OSA in relation to age, menopausal status, comorbidities and level of systemic inflammation (hs-CRP)

| Factor                         |                      | Women              |             | Men                |             |
|--------------------------------|----------------------|--------------------|-------------|--------------------|-------------|
|                                |                      | Beta               | OR (95%CI)  | Beta               | OR (95%CI)  |
| Age                            | 45-49 *              | Reference category |             | Reference category |             |
|                                | 50-54                | 0.81               | 0.57 – 1.14 | 1.09               | 0.87 – 1.38 |
|                                | 55-59                | 0.88               | 0.59 – 1.31 | 1.59               | 1.27 – 2.00 |
|                                | 60-64                | 0.93               | 0.61 – 1.41 | 1.29               | 1.01 – 1.64 |
|                                | 65-69                | 1.22               | 0.78 – 1.89 | 1.23               | 0.95 – 1.60 |
|                                | 70-74                | 0.93               | 0.57 – 1.50 | 1.15               | 0.87 – 1.52 |
|                                | 75-79                | 0.93               | 0.57 – 1.52 | 0.92               | 0.69 – 1.23 |
|                                | ≥80                  | 0.80               | 0.47 – 1.37 | 0.96               | 0.69 – 1.32 |
| Level of inflammation (hs-CRP) | Normal (<1 mg/L) *   | Reference category |             | Reference category |             |
|                                | Mild (1-3 mg/L)      | 2.13               | 1.76 – 2.59 | 1.58               | 1.41 – 1.77 |
|                                | Moderate (3-10 mg/L) | 3.16               | 2.57 – 3.87 | 2.18               | 1.88 – 2.51 |
|                                | High (>10 mg/L)      | 4.08               | 2.88 – 5.79 | 1.82               | 1.82 – 2.48 |
| Post-menopausal                |                      | 1.70               | 1.25 – 2.32 | -----              | -----       |
| Comorbidities                  | Diabetes             | 2.35               | 1.97 – 2.80 | 1.86               | 1.65 – 2.11 |
|                                | Cardiovascular       | 1.81               | 1.43 – 2.29 | 1.40               | 1.22 – 1.60 |
|                                | Anxiety- Depression  | 1.70               | 1.44 – 1.99 | 1.31               | 1.14 – 1.51 |
|                                | Cerebrovascular      | 1.49               | 1.03 – 2.17 | 1.48               | 1.18 – 1.85 |
|                                | Arthritis            | 1.35               | 1.16 – 1.58 | 1.27               | 1.14 – 1.42 |
|                                | Asthma               | 1.33               | 1.09 – 1.60 | 1.24               | 1.06 – 1.45 |
|                                | Memory problems      | 1.04               | 0.56 – 1.92 | 1.78               | 1.21 – 2.62 |
|                                | Osteoporosis         | 0.73               | 0.59 – 0.91 | 0.82               | 0.58 – 1.18 |
|                                | Hypothyroidism       | 1.17               | 0.98 – 1.39 | 1.00               | 0.81 – 1.23 |
|                                | Dementia             | 0.77               | 0.17 – 3.47 | 0.59               | 0.18 – 1.96 |
|                                | COPD                 | 1.13               | 0.85 – 1.51 | 1.09               | 0.86 – 1.37 |
|                                | Parkinson's disease  | 1.65               | 0.51 – 5.33 | 0.69               | 0.32 – 1.46 |

**Notes:** Asterisks indicate the reference categories.

**Abbreviations:** OSA: obstructive sleep apnea; hs-CRP: high sensitivity C-reactive protein; OR: odds ratio.



**Supplementary table S3:** Sex-specific, weighted multiple linear regressions testing the association of signs and symptoms used in the STOP-Obesity score to estimate risk of OSA, and blood hs-CRP

|       |                                    | <b>Beta (95% CI)</b> | <b>SE</b> | <b>t</b> | <b>p</b> |
|-------|------------------------------------|----------------------|-----------|----------|----------|
| Women | Snoring [S]                        | 0.63 (0.42 – 0.85)   | 0.11      | 5.78     | <0.001   |
|       | Tiredness, sleepiness, fatigue [T] | 0.54 (0.22 – 0.86)   | 0.16      | 3.31     | 0.001    |
|       | Observed apneas [O]                | 1.08 (0.78 – 1.39)   | 0.16      | 6.92     | <0.001   |
|       | High blood pressure [P]            | 0.67 (0.48 – 0.86)   | 0.10      | 6.97     | <0.001   |
|       | % body fat >35% [Obesity]          | 1.50 (1.31 – 1.70)   | 0.10      | 15.04    | <0.001   |
| Men   | Snoring [S]                        | -0.05 (-0.21 – 0.12) | 0.09      | -0.54    | 0.591    |
|       | Tiredness, sleepiness, fatigue [T] | 0.12 (-0.16 – 0.40)  | 0.14      | 0.82     | 0.410    |
|       | Observed apneas [O]                | 0.32 (0.12 – 0.51)   | 0.10      | 3.13     | 0.002    |
|       | High blood pressure [P]            | 0.48 (0.32 – 0.65)   | 0.09      | 5.67     | <0.001   |
|       | % body fat >25% [Obesity]          | 0.88 (0.71 – 1.06)   | 0.09      | 10.04    | <0.001   |

**Abbreviations:** OSA: obstructive sleep apnea; hs-CRP: high sensitivity C-reactive protein; CI: confidence interval; SE: standard error.

## SUPPLEMENTARY FIGURE CAPTION

**Figure S1:** Prevalence of A) diabetes; B) cardiovascular diseases; C) anxiety-depression; D) cerebrovascular diseases; E) arthritis; F) asthma; G) memory problems; H) osteoporosis; and I) moderate to high levels of inflammation in women (dark curve) and men (light curve) according to the age group. Data represent prevalence obtained in all women and men, regardless of their risk of having OSA.
